# Supplementary material
Source: PubMed Central journal article supplement (PMC4878218)
Supplement: DC152672SupplementaryData.pdf [file DC152672SupplementaryData.pdf]

SUPPLEMENTARY DATA

**Supplementary Table 1. Summary of Selected Characteristics by GDM Subtype (Compared to Women with Normal Glucose Tolerance)**

|                            | <b>GDM-Secretion</b> | <b>GDM-Sensitivity</b> | <b>GDM-Mixed</b> | <b>NGT</b> |
|----------------------------|----------------------|------------------------|------------------|------------|
| <b>Insulin Sensitivity</b> | ↔                    | ↓↓                     | ↓                | Reference  |
| <b>Insulin Secretion</b>   | ↓↓                   | ↑                      | ↓                | Reference  |
| <b>Disposition Index</b>   | ↓                    | ↓                      | ↓                | Reference  |
| <b>Fasting Glucose</b>     | ↔                    | ↑                      | ↑                | Reference  |
| <b>Post-Load Glucose</b>   | ↑                    | ↑                      | ↑                | Reference  |
| <b>Body Mass Index</b>     | ↔                    | ↑                      | ↔                | Reference  |
| <b>Adiponectin</b>         | ↔                    | ↓                      | ↔                | Reference  |
| <b>Leptin</b>              | ↔                    | ↑                      | ↔                | Reference  |
| <b>Infant Birth Weight</b> | ↔                    | ↑                      | ↔                | Reference  |

**Supplementary Figure 1. Insulin Secretion and Sensitivity in Women with Normal Glucose Tolerance and Gestational Diabetes Mellitus, by Subtype**

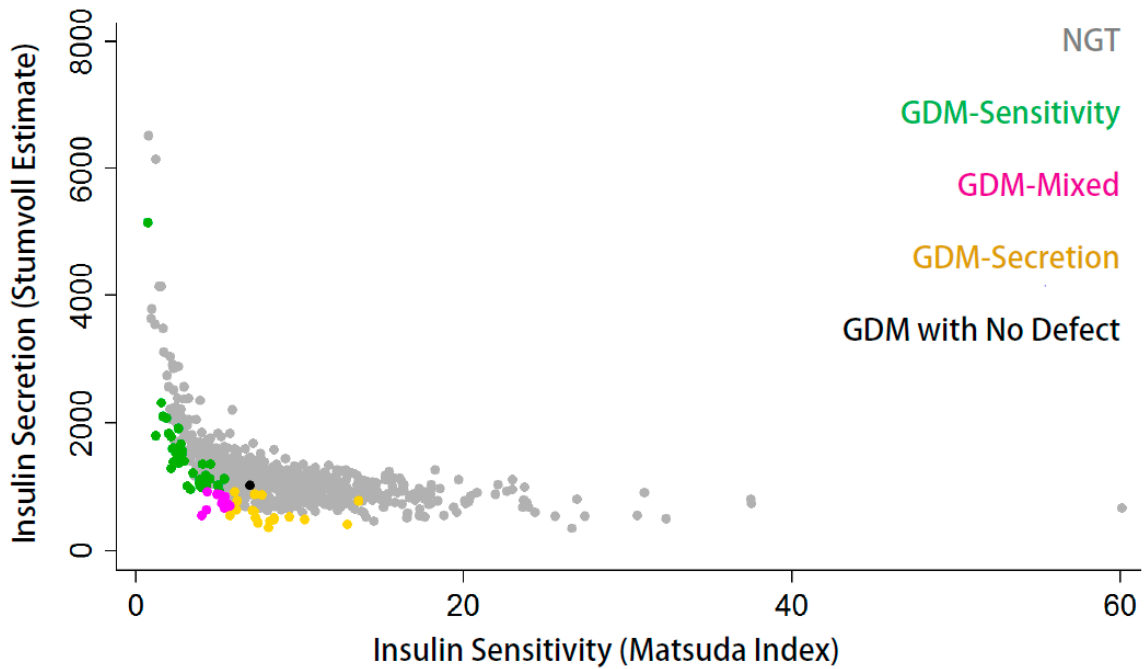

There were 67 women (8.3%) with gestational diabetes mellitus (GDM). The grey circles represent women with normal glucose tolerance (NGT). Based on insulin secretion and sensitivity defects (<25<sup>th</sup> percentile in women with NGT), we classified women with GDM into physiologic subtypes: GDM with a predominant insulin secretion defect (GDM-Secretion, in gold), GDM with a predominant insulin sensitivity defect (GDM-Sensitivity, in green), or GDM with both defects (GDM-Mixed, in mixed). One participant with GDM had both insulin secretion and sensitivity above the 25<sup>th</sup> percentile (in black).
